# Supplementary material for: Low Brachial Artery Flow-Mediated Dilation Predicts Worse Prognosis in Hospitalized Patients with COVID-19
Source: MDPI journal article supplement (doi:10.3390/jcm10225456), 2021-11-22
Supplement: s1 [file s1]

**Table S1.** Association between low bFMD and ICU admission.

| <b>Model 1</b>   | <b>HR</b> | <b>95% CI</b> | <b><i>p</i></b> |
|------------------|-----------|---------------|-----------------|
| Low bFMD (<4.4%) | 2.258     | 1.088–4.684   | 0.029           |
| <b>Model 2</b>   | <b>HR</b> | <b>95% CI</b> | <b><i>p</i></b> |
| Low bFMD (<4.4%) | 1.670     | 0.795–3.507   | 0.176           |
| <b>Model 3</b>   | <b>HR</b> | <b>95% CI</b> | <b><i>p</i></b> |
| Low bFMD (<4.4%) | 1.905     | 0.817–4.445   | 0.136           |
| <b>Model 4</b>   | <b>HR</b> | <b>95% CI</b> | <b><i>p</i></b> |
| Low bFMD (<4.4%) | 3.113     | 1.314–7.373   | 0.010           |
| <b>Model 5</b>   | <b>HR</b> | <b>95% CI</b> | <b><i>p</i></b> |
| Low bFMD (<4.4%) | 1.886     | 0.871–4.083   | 0.107           |

Five Cox proportional hazard models (i.e., Model 1–5) were plotted by including the time to ICU admission/in-hospital death as the time variable, the composite endpoint of ICU-admission/in-hospital death as the status variable and the following covariates: (1) low bFMD (bFMD < 4.4%), age, male gender, and BMI (Model 1), (2) low bFMD (bFMD < 4.4%), age, male gender, BMI, PaO<sub>2</sub>/FiO<sub>2</sub> and CURB-65 score (Model 2), (3) low bFMD (bFMD < 4.4%), age, male gender, BMI, PaO<sub>2</sub>/FiO<sub>2</sub>, CURB-65 score, eGFR, leukocytes, CRP, D-dimer, hs-cTn, and LDH (Model 3), (4) low bFMD (bFMD < 4.4%), age, male gender, BMI, type 2 diabetes, current smoking, CKD, hypertension, and history of previous CV event (Model 4), (5) low bFMD (bFMD < 4.4%, age, male gender, BMI, ACE-inhibitors, ARBs, statins, DOACs, VKAs, LMWH, anti-platelets, BBs, CCBs, diuretics, insulin, and oral hypoglycemic agents (Model 5). Abbreviations: bFMD, brachial flow-mediated dilation; CI, confidence interval; HR, hazard ratio.

**Table S2.** Association between low bFMD and in-hospital deaths.

| <b>Model 1</b>   | <b>HR</b> | <b>95% CI</b> | <b><i>p</i></b> |
|------------------|-----------|---------------|-----------------|
| Low bFMD (<4.4%) | 1.533     | 1.004–2.343   | 0.048           |
| <b>Model 2</b>   | <b>HR</b> | <b>95% CI</b> | <b><i>p</i></b> |
| Low bFMD (<4.4%) | 1.402     | 0.911–2.157   | 0.124           |
| <b>Model 3</b>   | <b>HR</b> | <b>95% CI</b> | <b><i>p</i></b> |
| Low bFMD (<4.4%) | 1.427     | 0.846–2.408   | 0.182           |
| <b>Model 4</b>   | <b>HR</b> | <b>95% CI</b> | <b><i>p</i></b> |
| Low bFMD (<4.4%) | 1.325     | 0.824–2.132   | 0.246           |
| <b>Model 5</b>   | <b>HR</b> | <b>95% CI</b> | <b><i>p</i></b> |
| Low bFMD (<4.4%) | 1.654     | 1.054–2.594   | 0.029           |

Five Cox proportional hazard models (i.e., Model 1–5) were plotted by including the time to ICU admission/in-hospital death as the time variable, the composite endpoint of ICU-admission/in-hospital death as the status variable and the following covariates: (1) low bFMD (bFMD < 4.4%), age, male gender, and BMI (Model 1), (2) low bFMD (bFMD < 4.4%), age, male gender, BMI, PaO<sub>2</sub>/FiO<sub>2</sub> and CURB-65 score (Model 2), (3) low bFMD (bFMD < 4.4%), age, male gender, BMI, PaO<sub>2</sub>/FiO<sub>2</sub>, CURB-65 score, eGFR, leukocytes, CRP, D-dimer, hs-cTn, and LDH (Model 3), (4) low bFMD (bFMD < 4.4%), age, male gender, BMI, type 2 diabetes, current smoking, CKD, hypertension, and history of previous CV event (Model 4), (5) low bFMD (bFMD < 4.4%, age, male gender, BMI, ACE-inhibitors, ARBs, statins, DOACs, VKAs, LMWH, anti-platelets, BBs, CCBs, diuretics, insulin, and oral hypoglycemic agents (Model 5). Abbreviations: bFMD, brachial flow-mediated dilation; CI, confidence interval; HR, hazard ratio.
